# Supplementary figures and images for: Senescence-associated secretory phenotype favors the emergence of cancer stem-like cells
Source: PubMed Central journal article supplement — Cell Death Dis. 2012 Dec 20;3(12):e446–. doi: 10.1038/cddis.2012.183 (PMC3542619; doi:10.1038/cddis.2012.183), 2012-12-20

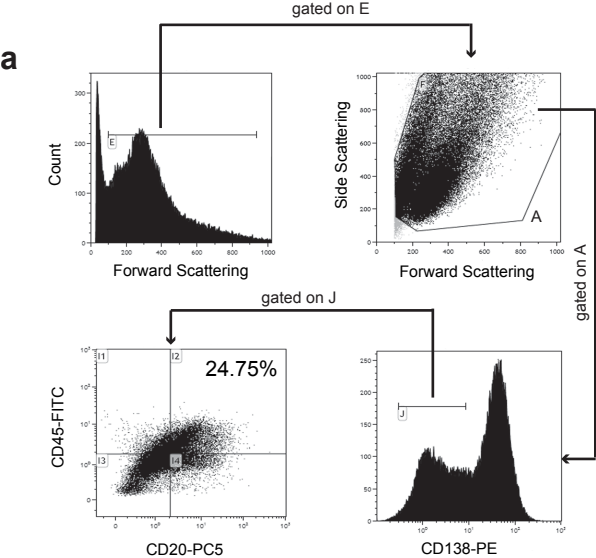

**b**

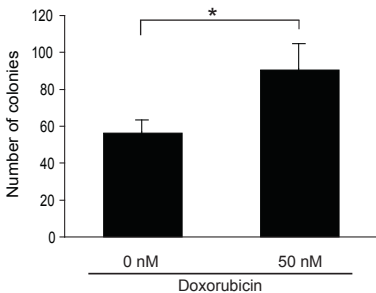

**Fig.S1**

Supplement: cddis2012183x2.pdf [file cddis2012183x2.pdf]

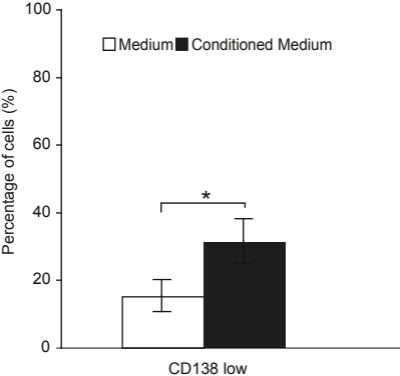

**Fig.S2**

Supplement: cddis2012183x3.pdf [file cddis2012183x3.pdf]
